# Supplementary material for: The impact of templating and macropores in hard carbons on their properties as negative electrode materials in sodium-ion batteries
Source: Royal Society of Chemistry journal article supplement (doi:10.1039/d4ya00129j), 2024-01-01
Supplement: d4ya00129j1.pdf [file d4ya00129j1.pdf]

## The impact of templating and macropores in hard carbons on their properties as negative electrode materials in sodium-ion batteries

### Supporting Information

Sofiia Prykhodska<sup>a</sup>, Konstantin Schutjajew<sup>a</sup>, Erik Troschke<sup>a</sup>, Leonid Kabarov<sup>b,c</sup>,  
Jonas Eichhorn<sup>b,c</sup>, Felix H. Schacher<sup>b,c,d</sup>, Francesco Walenszus<sup>e</sup>, Daniel Werner<sup>f</sup>,  
Martin Oschatz<sup>a,d,\*</sup>

- a. Friedrich-Schiller-University Jena, Institute for Technical Chemistry and Environmental Chemistry, Philosophenweg 7a, 07743 Jena, Germany.
- b. Institute of Organic Chemistry and Macromolecular Chemistry (IOMC), Friedrich Schiller-University Jena, Humboldtstraße 10, D-07743 Jena, Germany.
- c. Jena Center for Soft Matter (JCSM), Friedrich Schiller University Jena, Philosophenweg 7, 07743 Jena, Germany.
- d. Center for Energy and Environmental Chemistry Jena (CEEC Jena), Philosophenweg 7a, 07743 Jena, Germany.
- e. 3P INSTRUMENTS GmbH & Co. KG, Bitterfelder Str. 1-5, 04129 Leipzig, Germany.
- f. Max Planck Institute of Colloids and Interfaces, Department of Colloid Chemistry, Am Mühlenberg 1, 14476 Potsdam, Germany.

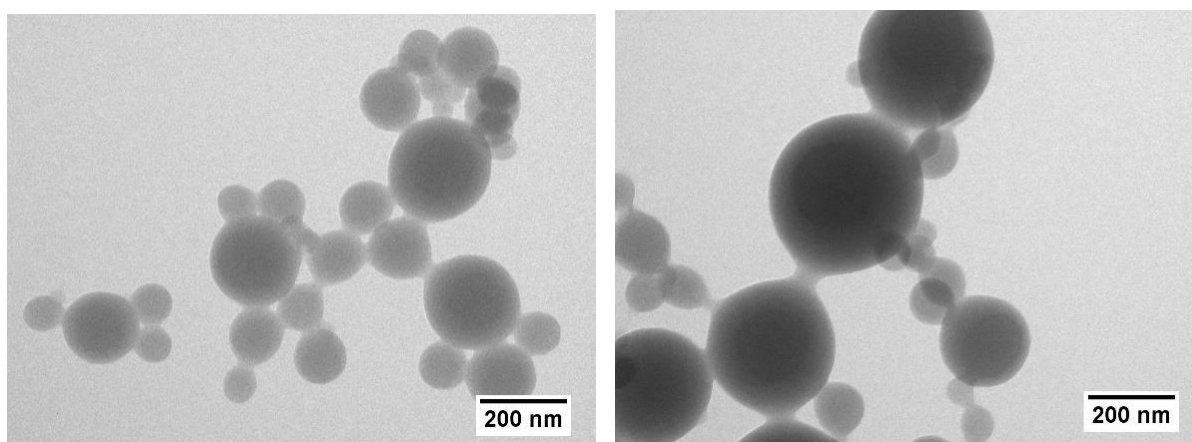

**Figure S1.** Transmission electron microscopy (TEM) images of polystyrene spheres.

**Table S1.**  $2\theta$  position of (002) and (100) reflections as well as full width at half maximum (FWHM) from PXRD of hard carbon materials.

|                 | $2\theta$ (002), ° | $2\theta$ (100), ° | FWHM (002) | FWHM (100) |
|-----------------|--------------------|--------------------|------------|------------|
| <b>PS-HC-2</b>  | 23.55              | 43.90              | 5.69       | 3.81       |
| <b>PS-HC-20</b> | 23.92              | 44.04              | 5.59       | 4.19       |
| <b>HC</b>       | 23.90              | 44.04              | 5.99       | 4.11       |

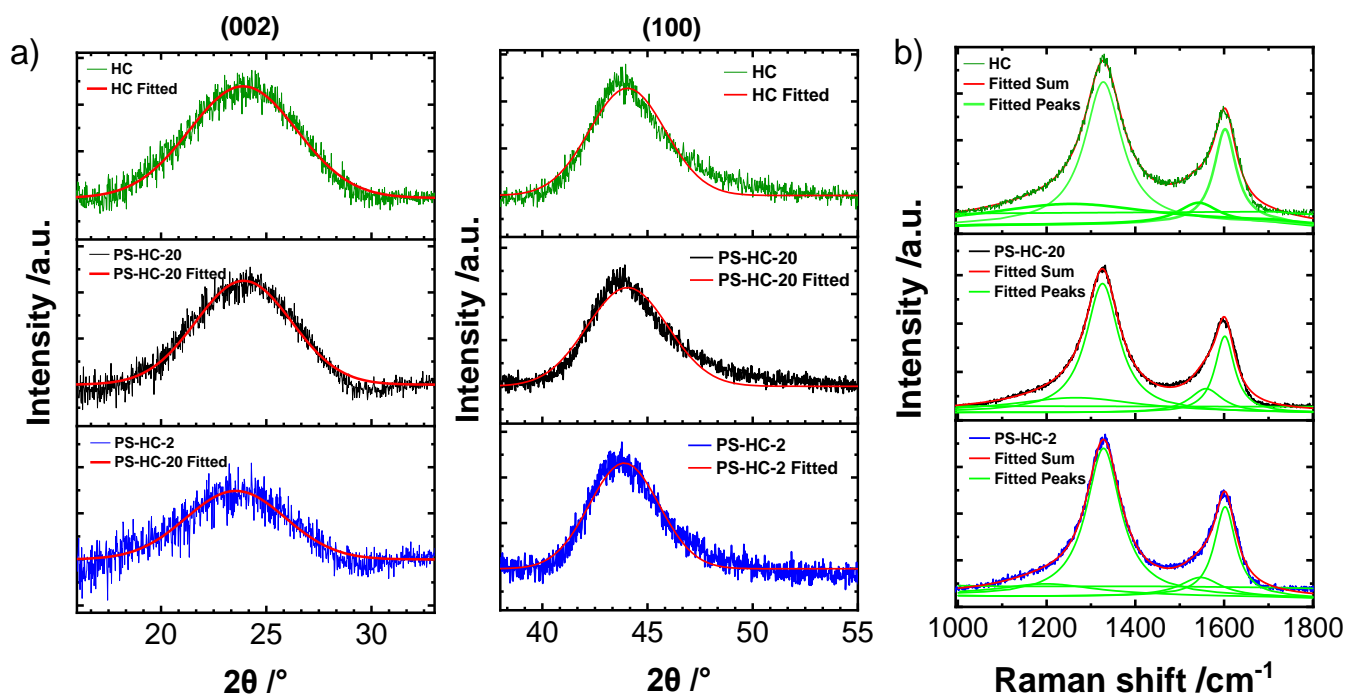

**Figure S2.** Fitted a) (002) and (100) reflections from powder X-Ray diffraction (PXRD) patterns. b) Raman spectra of hard carbon materials.

**Table S2.** Relevant characteristics of a hard carbon crystallite calculated from Scherrer equation.

|          | The crystalline coherency length in the stacking direction ( $L_c$ ), nm | The size of the layer in the plane direction ( $L_a$ ), nm |
|----------|--------------------------------------------------------------------------|------------------------------------------------------------|
| PS-HC-2  | 1.43                                                                     | 2.25                                                       |
| PS-HC-20 | 1.45                                                                     | 2.04                                                       |
| HC       | 1.36                                                                     | 2.08                                                       |

**Table S3.** Intensity ratios of A- and G-band from Raman spectroscopy of hard carbon materials.

|         | $I_A/I_G$ |          | $I_A/I_G$ |    | $I_A/I_G$ |
|---------|-----------|----------|-----------|----|-----------|
| PS-HC-2 | 0.22      | PS-HC-20 | 0.32      | HC | 0.22      |

**Table S4.** Data obtained from physisorption isotherms ( $N_2$  at 77 K and  $CO_2$  at 273 K) of hard carbon materials: QSDFT,  $N_2$  specific surface area and  $N_2$  uptake, 2D-NLDFT,  $CO_2$  pore volume, as well as  $CO_2$  uptake.

|          | $SSA_{QSDFT,N_2}$<br>$m^2 g^{-1}$ | $N_2$ uptake at 77 K,<br>$cm^3 g^{-1}$ | $CO_2$ uptake at<br>273 K,<br>$cm^3 g^{-1}$ | $V_{CO_2(<0.7\text{ nm})}$ ,<br>$cm^3 g^{-1}$ |
|----------|-----------------------------------|----------------------------------------|---------------------------------------------|-----------------------------------------------|
| PS-HC-2  | 10                                | 15.1                                   | 3.8                                         | 0.010                                         |
| PS-HC-20 | 1                                 | 2.1                                    | 0.4                                         | 0.003                                         |
| HC       | 1                                 | 2.0                                    | 0.3                                         | 0.002                                         |

**Table S5.** Elemental analysis data of hard carbon materials.

|          | C, wt % | O, wt % | H, wt % |
|----------|---------|---------|---------|
| PS-HC-2  | 99.18   | 0.82    | 0       |
| PS-HC-20 | 100.00  | 0       | 0       |
| HC       | 99.93   | 0.07    | 0       |

**Table S6.** Values of  $H_2O$  uptake at 298 K of hard carbon materials.

|         | $H_2O$ uptake at<br>298 K,<br>$cm^3 g^{-1}$ |          | $H_2O$ uptake at<br>298 K,<br>$cm^3 g^{-1}$ |    | $H_2O$ uptake at<br>298 K,<br>$cm^3 g^{-1}$ |
|---------|---------------------------------------------|----------|---------------------------------------------|----|---------------------------------------------|
| PS-HC-2 | 25.3                                        | PS-HC-20 | 9.0                                         | HC | 12.1                                        |

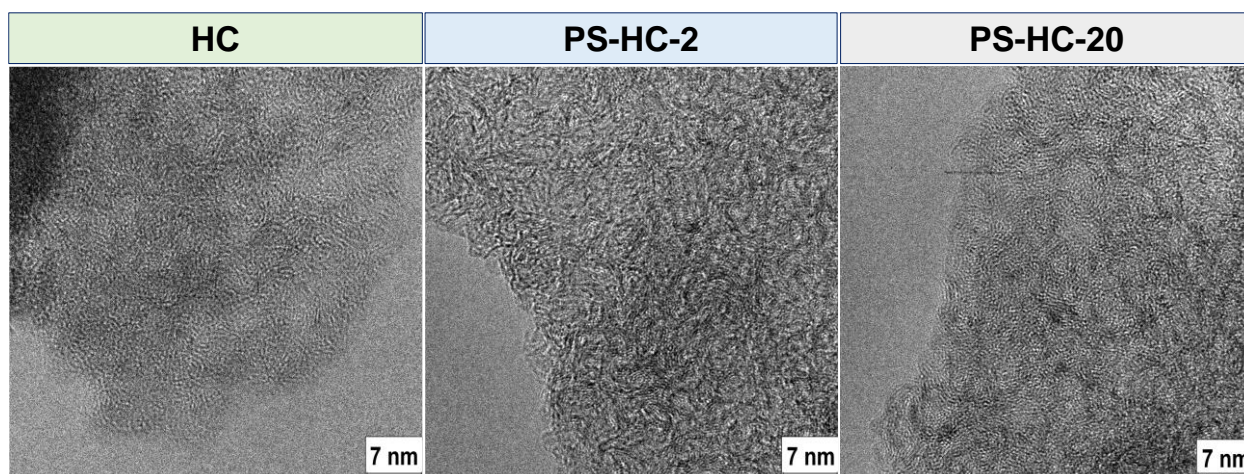

**Figure S3.** TEM images of hard carbon materials.

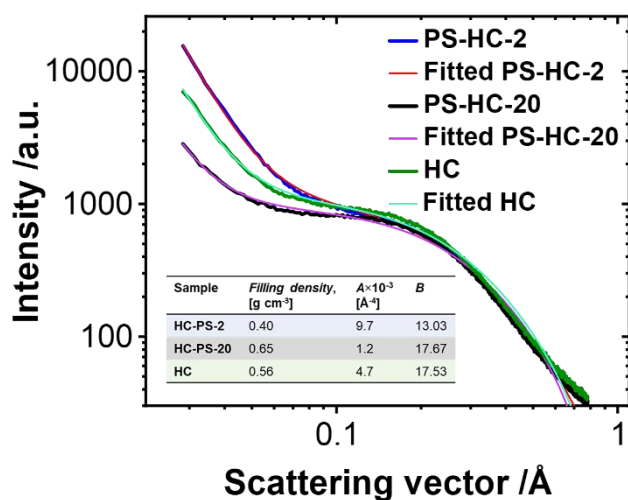

**Figure S4.** Fitted small-angle X-ray scattering (SAXS) curves of hard carbon materials.

**Table S7.** Pore characteristics of the materials determined from N<sub>2</sub> at 77 K and CO<sub>2</sub> at 273 K physisorptions of intermediate carbons after 600°C.

|              | SSA <sub>QSDFT,N<sub>2</sub></sub> ,<br>m <sup>2</sup> g <sup>-1</sup> | V <sub>N<sub>2</sub></sub> ,<br>cm <sup>3</sup> g <sup>-1</sup> | V <sub>CO<sub>2</sub>(&lt;0.7 nm)</sub> ,<br>cm <sup>3</sup> g <sup>-1</sup> |
|--------------|------------------------------------------------------------------------|-----------------------------------------------------------------|------------------------------------------------------------------------------|
| PS-HC-2-600  | 566                                                                    | 0.22                                                            | 0.174                                                                        |
| PS-HC-20-600 | 464                                                                    | 0.20                                                            | 0.181                                                                        |
| HC-600       | 474                                                                    | 0.18                                                            | 0.173                                                                        |

**Table S8.** Elemental analysis data of intermediate carbons after 600°C.

|              | C, wt % | O, wt % | H, wt % |
|--------------|---------|---------|---------|
| PS-HC-2-600  | 90.79   | 6.67    | 2.54    |
| PS-HC-20-600 | 90.95   | 6.75    | 2.30    |
| HC-600       | 90.78   | 6.91    | 2.31    |

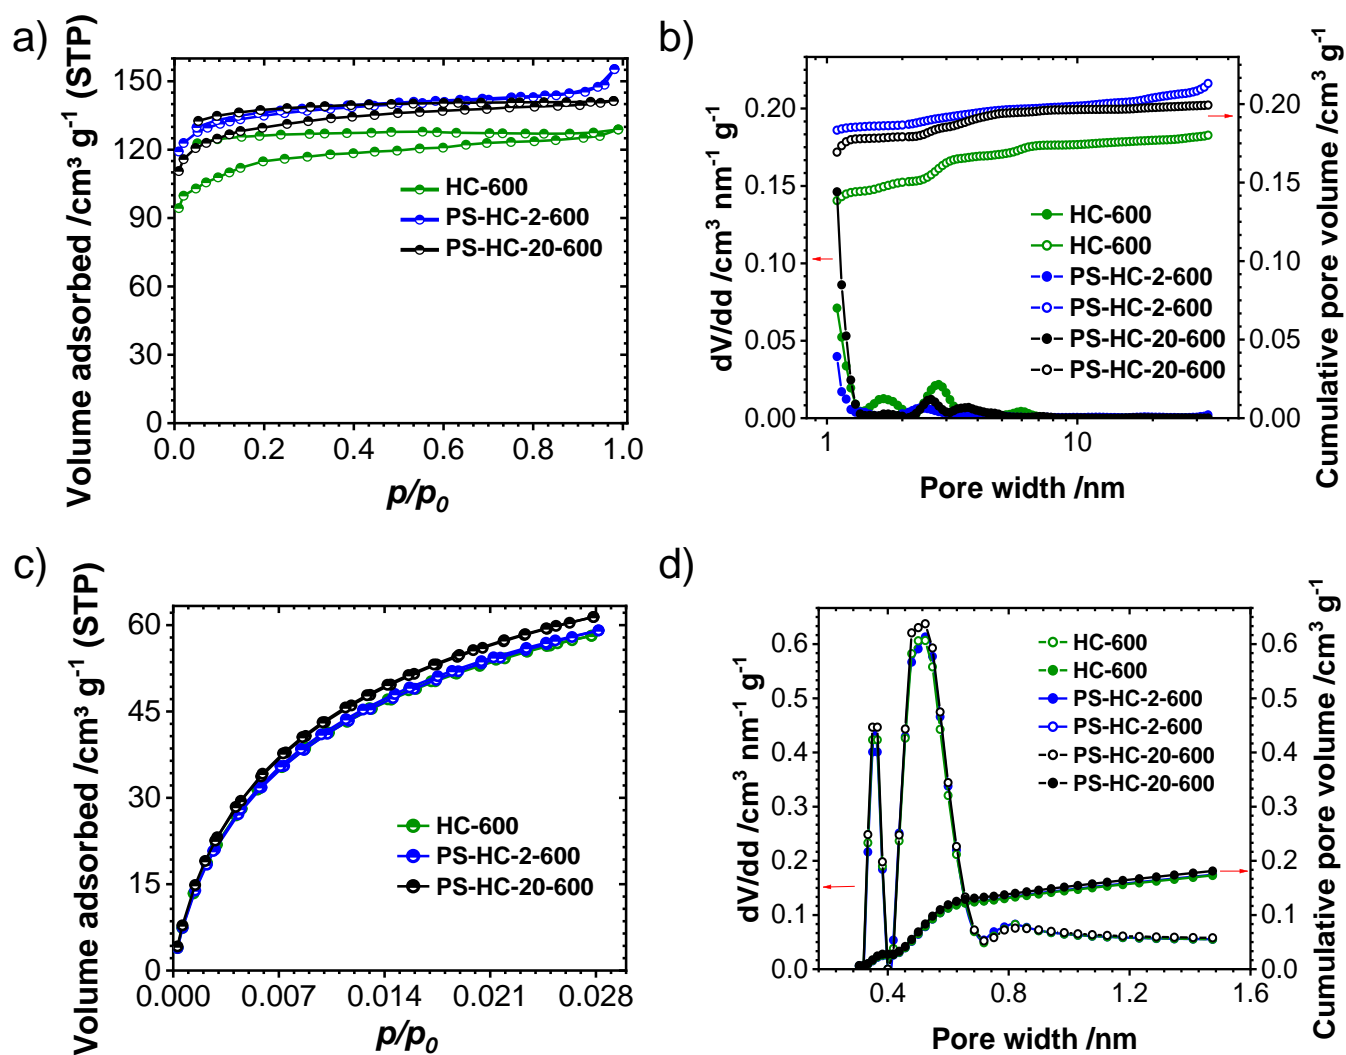

**Figure S5.** a) N<sub>2</sub>-physisorption isotherms at 77 K; c) CO<sub>2</sub>-physisorption isotherms at 273 K; b), d) Calculated pore size distributions of intermediate carbons after 600°C.

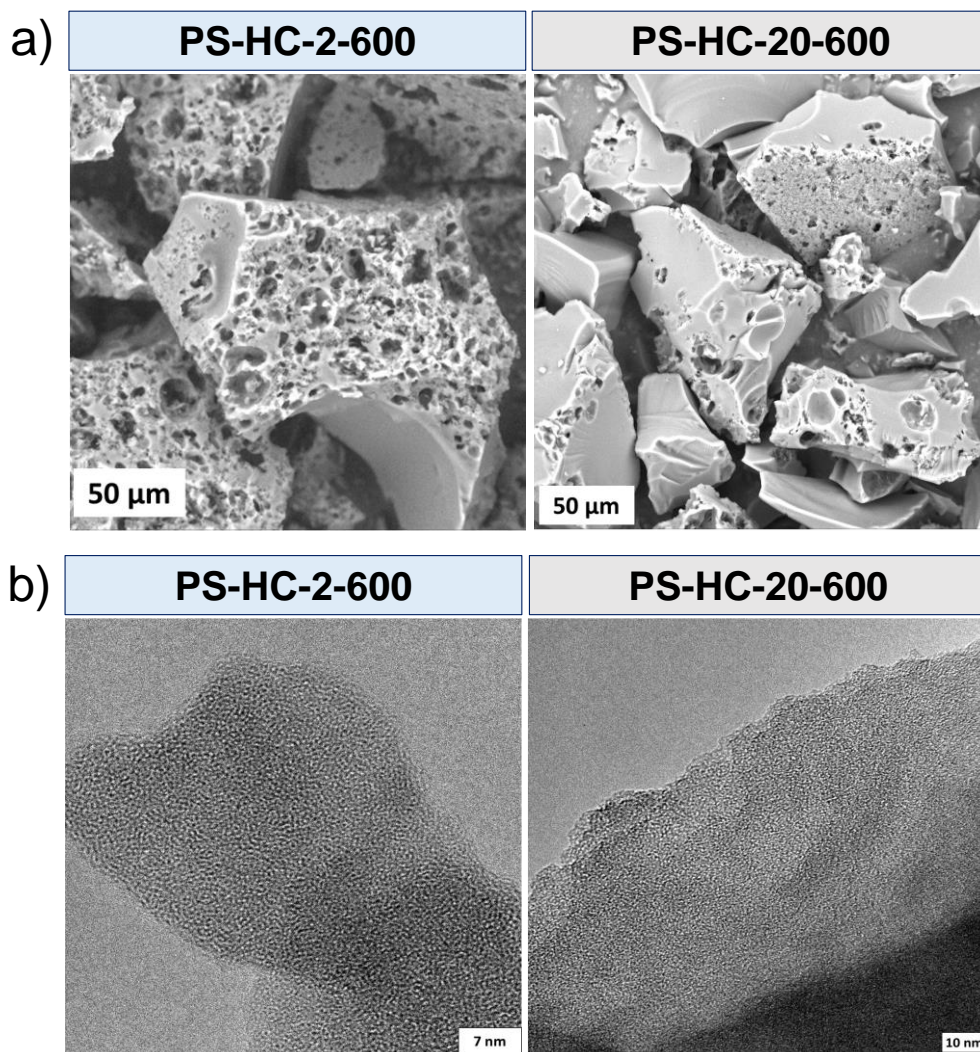

**Figure S6.** a) SEM images. b) TEM images of intermediate carbons after 600 °C.

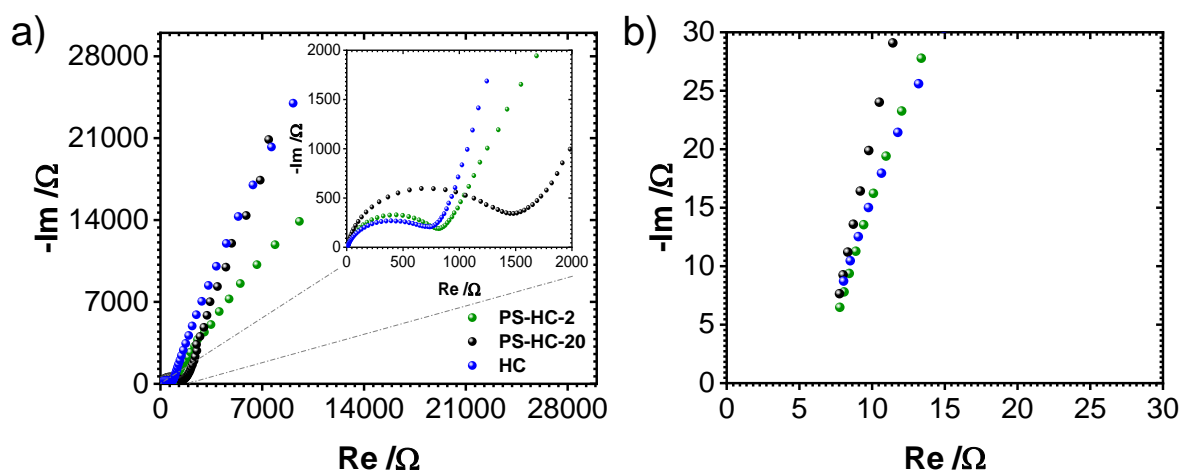

**Figure S7.** Electrochemical impedance spectra of hard carbons unaltered by solid electrolyte interphase (SEI).



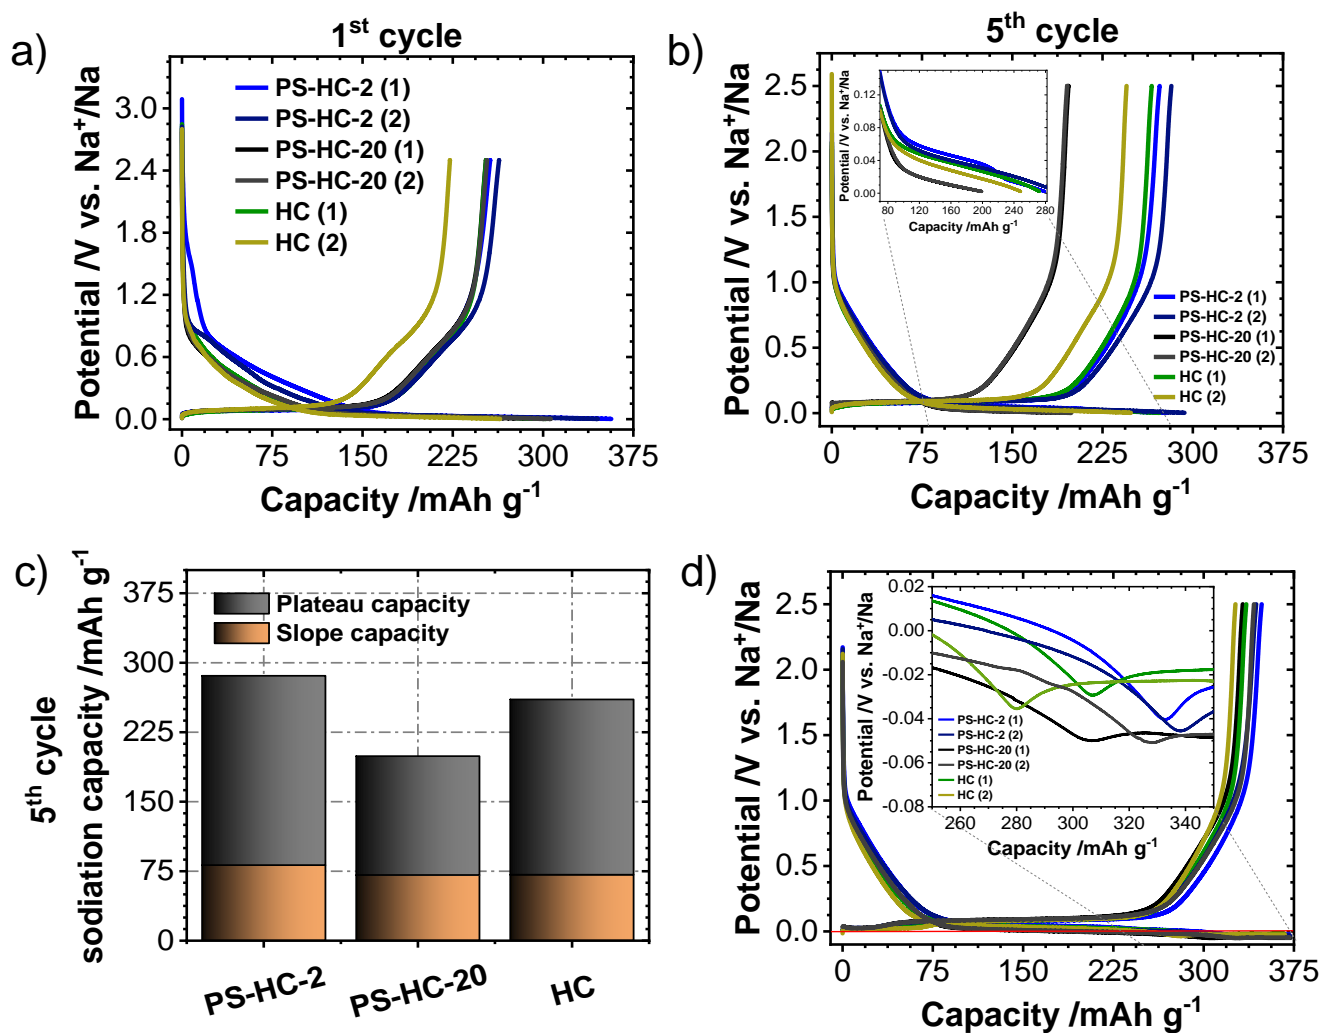

**Figure S8.** Galvanostatic charge-discharge curves of hard carbon materials recorded at C/20 current density from 2 experiments. a) Voltage limited 1<sup>st</sup> cycle. b) Voltage limited stable cycle (5<sup>th</sup>). c) A bar representing average from 2 experiments slope as well as plateau capacities of hard carbon materials in voltage limited stable cycle (5<sup>th</sup>). d) Capacity limited cycle.

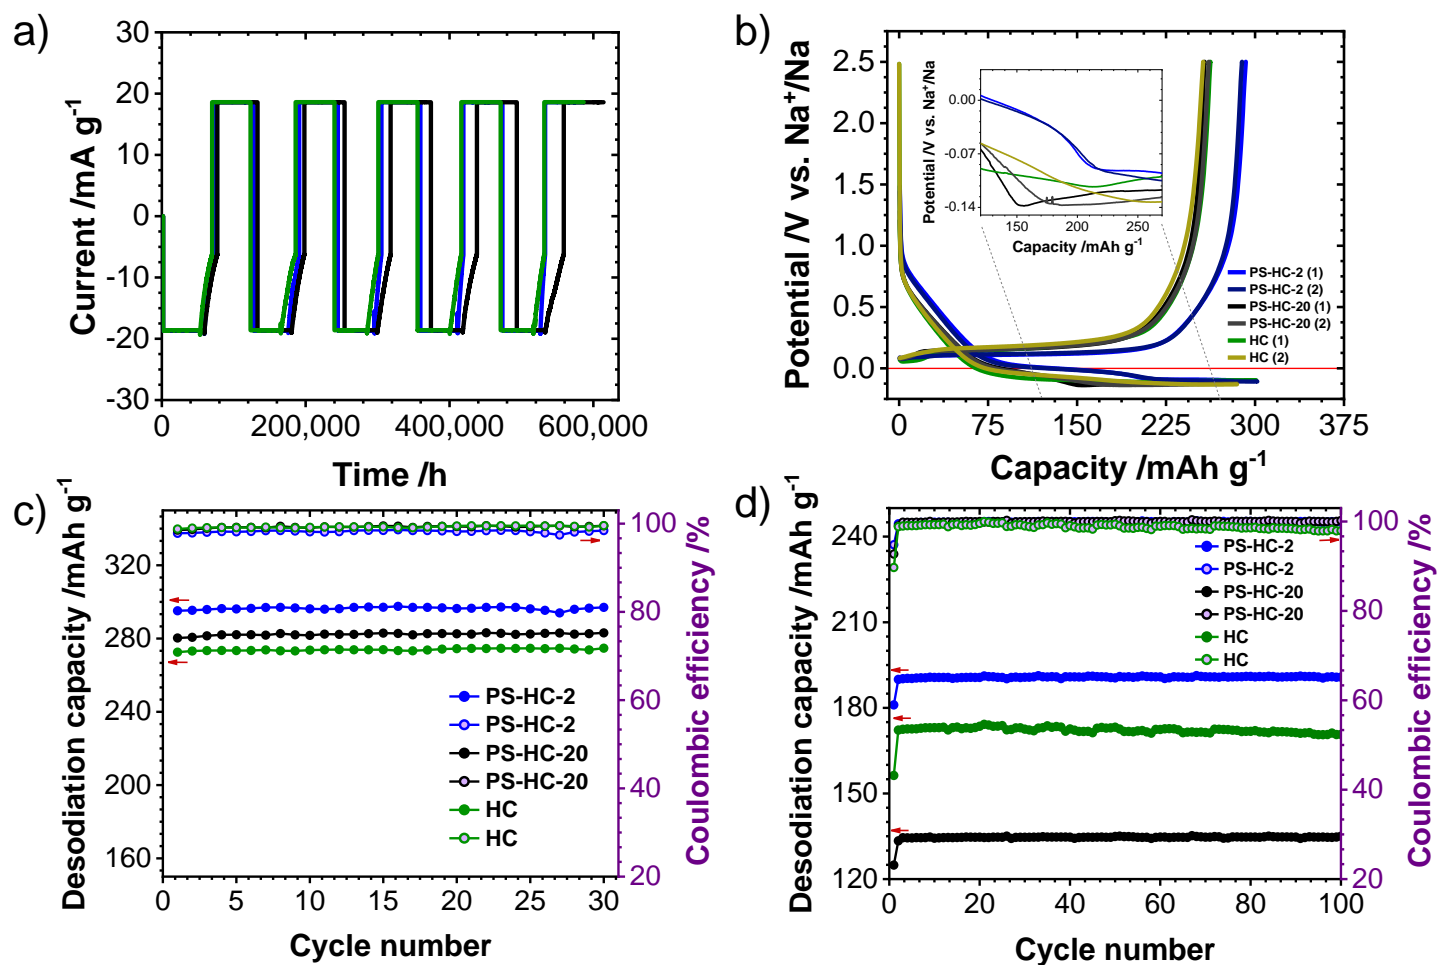

**Figure S9.** a) Representation in the scale current vs time of overall galvanostatic charge-discharge processes at C/20 current density with constant voltage step (2 mV). b) Capacity limited cycle of 2 experiments recorded at C/2 current density. c) Cycling at C/20 current density until 30 cycles with a capacity limitation. d) Cycling at C/2 current density until 100 cycles with a capacity limitation.
